# Supplementary material for: Identification of genes related to intramuscular fat content of pigs using genome-wide association study
Source: PubMed Central journal article supplement — Asian-Australas J Anim Sci. 2017 Jun 27;31(2):157–62. doi: 10.5713/ajas.17.0218 (PMC5767496; doi:10.5713/ajas.17.0218), 2017-06-27
Supplement: ajas-31-2-157-supplementary.pdf [file ajas-31-2-157-supplementary.pdf]

1 **Supplementary Data**

2

3 **Supplementary Table S1.** SNPs and their chromosome number (Chr.), position on the chromosome, annotated  
 4 gene name, distance from the gene, raw p-value are listed. 'match' indicates that the SNP was included in the gene  
 5 and '-' indicates that no gene was in 100kd distance of the SNPs.

| SNP         | Chr | Position | Gene     | Distance | p-value  |
|-------------|-----|----------|----------|----------|----------|
| MARC0018001 | 1   | 13478198 | -        | -        | 2.04E-03 |
| ASGA0001052 | 1   | 13677927 | CLDN20   | 85316    | 8.32E-03 |
| M1GA0000785 | 1   | 16529867 | ESR1     | 12501    | 7.76E-03 |
| ALGA0001232 | 1   | 17130048 | CCDC170  | match    | 5.20E-04 |
| ASGA0001260 | 1   | 17256411 | RMND1    | match    | 2.22E-03 |
| ALGA0001244 | 1   | 17279855 | ZBTB2    | 16864    | 1.76E-03 |
| DRGA0001141 | 1   | 79571312 | -        | -        | 6.11E-03 |
| INRA0002909 | 1   | 83308522 | SEC63    | match    | 9.40E-03 |
| ALGA0005610 | 1   | 1.25E+08 | -        | -        | 8.69E-03 |
| H3GA0003313 | 1   | 1.86E+08 | -        | -        | 5.19E-03 |
| ALGA0007007 | 1   | 1.91E+08 | -        | -        | 9.84E-03 |
| INRA0005278 | 1   | 1.92E+08 | LRFN5    | 51070    | 3.96E-03 |
| MARC0080275 | 1   | 1.92E+08 | LRFN5    | 22518    | 3.96E-03 |
| ASGA0005303 | 1   | 1.92E+08 | LRFN5    | 2176     | 3.96E-03 |
| MARC0033468 | 1   | 1.92E+08 | LRFN5    | 13558    | 4.74E-03 |
| H3GA0003345 | 1   | 1.92E+08 | LRFN5    | 31112    | 4.81E-03 |
| MARC0002276 | 1   | 1.92E+08 | LRFN5    | 48118    | 6.86E-03 |
| ALGA0007015 | 1   | 1.92E+08 | LRFN5    | 63056    | 2.69E-03 |
| ALGA0115186 | 1   | 1.92E+08 | -        | -        | 3.79E-03 |
| MARC0036886 | 1   | 2.13E+08 | NTRK3    | match    | 9.80E-03 |
| ASGA0005512 | 1   | 2.14E+08 | -        | -        | 6.56E-03 |
| M1GA0001554 | 1   | 2.97E+08 | SNORD90  | 44608    | 2.30E-03 |
| ASGA0008803 | 2   | 6896014  | GPR137   | match    | 5.42E-03 |
| M1GA0002584 | 2   | 9336635  | MYRF     | 4509     | 7.74E-03 |
| MARC0005659 | 2   | 20249153 | HSD17B12 | 37203    | 5.24E-03 |
| ALGA0112320 | 2   | 20842615 | -        | -        | 4.44E-03 |
| ALGA0109169 | 2   | 22336683 | -        | -        | 5.67E-03 |

|             |   |          |         |       |          |
|-------------|---|----------|---------|-------|----------|
| ALGA0012462 | 2 | 22590108 | -       | -     | 7.23E-03 |
| ALGA0012504 | 2 | 23230160 | -       | -     | 2.98E-03 |
| ASGA0009568 | 2 | 23271214 | -       | -     | 3.68E-04 |
| ALGA0012515 | 2 | 23297131 | -       | -     | 7.60E-03 |
| ALGA0113768 | 2 | 32333658 | DCDC1   | 72522 | 3.06E-03 |
| ALGA0012891 | 2 | 32621630 | MPPED2  | match | 4.27E-03 |
| ASGA0009858 | 2 | 32649983 | MPPED2  | match | 4.42E-03 |
| ALGA0012897 | 2 | 32887535 | FSHB    | 22530 | 8.46E-03 |
| MARC0113797 | 2 | 33100405 | -       | -     | 6.46E-03 |
| H3GA0006477 | 2 | 33751046 | -       | -     | 9.35E-03 |
| MARC0061061 | 2 | 35054445 | -       | -     | 6.69E-03 |
| MARC0049526 | 2 | 35068263 | -       | -     | 9.62E-03 |
| MARC0057893 | 2 | 35069583 | -       | -     | 7.40E-03 |
| ALGA0012954 | 2 | 35089353 | -       | -     | 7.40E-03 |
| MARC0067928 | 2 | 65512888 | CC2D1A  | match | 6.55E-03 |
| ALGA0013819 | 2 | 65741376 | CCDC130 | 41960 | 4.27E-03 |
| ALGA0013817 | 2 | 65761499 | CCDC130 | 62083 | 4.52E-03 |
| MARC0097970 | 2 | 67524684 | OR7G3   | 94155 | 4.94E-03 |
| DIAS0000914 | 2 | 69067481 | PIN1    | 8231  | 1.23E-03 |
| ALGA0014210 | 2 | 88585407 | -       | -     | 9.87E-03 |
| ASGA0010795 | 2 | 89804886 | HOMER1  | 39474 | 7.47E-03 |
| H3GA0007086 | 2 | 90190571 | CMYA5   | 3578  | 9.71E-03 |
| ALGA0123643 | 2 | 1.36E+08 | CTXN3   | 66969 | 3.84E-03 |
| ALGA0015985 | 2 | 1.37E+08 | -       | -     | 1.71E-03 |
| H3GA0007722 | 2 | 1.38E+08 | -       | -     | 7.32E-03 |
| DRGA0003625 | 2 | 1.38E+08 | -       | -     | 7.26E-03 |
| MARC0063459 | 2 | 1.39E+08 | -       | -     | 7.08E-03 |
| ALGA0118500 | 3 | 12373502 | -       | -     | 6.27E-03 |
| MARC0113856 | 3 | 18690752 | ATXN2L  | 1178  | 2.09E-03 |
| ASGA0090908 | 3 | 18873907 | SBK1    | 6056  | 7.01E-03 |
| ALGA0102956 | 3 | 18876394 | SBK1    | 8543  | 7.72E-03 |
| ALGA0116808 | 3 | 18943557 | XPO6    | 60677 | 2.51E-03 |
| ALGA0114914 | 3 | 32478883 | -       | -     | 5.23E-03 |

|             |   |          |          |       |          |
|-------------|---|----------|----------|-------|----------|
| ALGA0107071 | 3 | 35759370 | -        | -     | 8.58E-03 |
| ALGA0018852 | 3 | 49511934 | EDAR     | 91461 | 1.76E-03 |
| ALGA0018859 | 3 | 49555847 | EDAR     | 47548 | 3.38E-03 |
| H3GA0009479 | 3 | 49619062 | EDAR     | match | 1.40E-03 |
| ALGA0018869 | 3 | 49634868 | CCDC138  | match | 2.27E-03 |
| MARC0016359 | 3 | 49652312 | CCDC138  | match | 4.49E-03 |
| ALGA0018856 | 3 | 49698069 | CCDC138  | 12421 | 2.79E-03 |
| ASGA0014485 | 3 | 49720172 | CCDC138  | 34524 | 2.54E-03 |
| ALGA0104619 | 3 | 49867263 | GCC2     | 20143 | 2.27E-03 |
| CASI0006979 | 3 | 49869950 | GCC2     | 17456 | 2.27E-03 |
| MARC0009789 | 3 | 55205882 | -        | -     | 8.46E-03 |
| MARC0100326 | 3 | 55496229 | CREG2    | match | 9.63E-03 |
| ALGA0019011 | 3 | 55561820 | RNF149   | 16604 | 5.46E-03 |
| MARC0065978 | 3 | 55717403 | TBC1D8   | 59678 | 2.81E-03 |
| ALGA0019168 | 3 | 58986683 | TMEM131  | match | 4.92E-03 |
| ASGA0094490 | 3 | 1.26E+08 | GDF7     | 15667 | 5.33E-03 |
| ASGA0103683 | 3 | 1.35E+08 | ITGB1BP1 | match | 5.83E-03 |
| H3GA0011795 | 4 | 8845519  | -        | -     | 1.98E-03 |
| ALGA0023171 | 4 | 11921004 | -        | -     | 6.29E-03 |
| ASGA0018288 | 4 | 11933016 | -        | -     | 4.40E-03 |
| ALGA0023189 | 4 | 12065855 | -        | -     | 9.08E-03 |
| ASGA0018338 | 4 | 12257838 | -        | -     | 7.63E-03 |
| ASGA0018370 | 4 | 12821695 | MYC      | 38214 | 2.85E-03 |
| ASGA0018384 | 4 | 12941813 | -        | -     | 4.70E-03 |
| DRGA0004465 | 4 | 13201853 | -        | -     | 8.34E-03 |
| ALGA0023289 | 4 | 13259971 | -        | -     | 6.89E-03 |
| ASGA0018422 | 4 | 13393209 | -        | -     | 6.96E-03 |
| ALGA0023303 | 4 | 13453436 | -        | -     | 6.17E-03 |
| ASGA0019158 | 4 | 33419642 | ABRA     | 57931 | 9.51E-03 |
| ASGA0019164 | 4 | 33447340 | ABRA     | 85629 | 9.51E-03 |
| M1GA0005832 | 4 | 33879367 | -        | -     | 8.95E-03 |
| ALGA0026965 | 4 | 1.04E+08 | KCNN3    | match | 8.73E-03 |
| INRA0015741 | 4 | 1.04E+08 | KCNN3    | match | 8.73E-03 |

|             |   |          |          |       |          |
|-------------|---|----------|----------|-------|----------|
| MARC0109265 | 4 | 1.19E+08 | DDX20    | match | 1.99E-03 |
| INRA0016754 | 4 | 1.23E+08 | -        | -     | 2.72E-03 |
| ALGA0123355 | 4 | 1.24E+08 | -        | -     | 7.76E-03 |
| H3GA0014317 | 4 | 1.25E+08 | -        | -     | 6.27E-03 |
| ALGA0028566 | 4 | 1.28E+08 | -        | -     | 4.13E-03 |
| ASGA0022428 | 4 | 1.28E+08 | -        | -     | 8.52E-03 |
| H3GA0014451 | 4 | 1.31E+08 | -        | -     | 9.21E-03 |
| MARC0071918 | 5 | 6772267  | DDX17    | match | 3.73E-03 |
| ASGA0106044 | 5 | 6784209  | DDX17    | 425   | 4.92E-03 |
| ALGA0105509 | 5 | 6793058  | KDELR3   | match | 4.09E-03 |
| M1GA0007422 | 5 | 6800467  | KDELR3   | 3641  | 3.48E-03 |
| ALGA0032587 | 5 | 69669256 | WASH1    | 24816 | 8.91E-03 |
| MARC0019446 | 6 | 1829369  | JPH3     | match | 8.52E-03 |
| ASGA0084674 | 6 | 1838412  | JPH3     | match | 7.89E-03 |
| ALGA0115499 | 6 | 11401848 | -        | -     | 9.15E-03 |
| ALGA0119163 | 6 | 40937246 | COX7A1   | 14345 | 6.24E-03 |
| MARC0005493 | 6 | 41367001 | ZNF260   | 47542 | 6.24E-03 |
| MARC0061190 | 6 | 41583185 | ZNF829   | match | 6.69E-03 |
| ALGA0115443 | 6 | 76356357 | -        | -     | 3.82E-03 |
| ALGA0105228 | 6 | 76712823 | MTFR1L   | match | 6.78E-03 |
| ASGA0097645 | 6 | 77180997 | PDIK1L   | match | 3.98E-03 |
| ASGA0098887 | 6 | 77540317 | RPS6KA1  | 60318 | 5.72E-03 |
| ALGA0105183 | 6 | 77561790 | RPS6KA1  | 81791 | 6.35E-03 |
| ALGA0035761 | 6 | 78173716 | CD164L2  | match | 8.02E-03 |
| ASGA0099240 | 6 | 78503422 | STX12    | 1399  | 8.27E-03 |
| MARC0018089 | 6 | 79884592 | EPB41    | 8507  | 9.02E-03 |
| ALGA0103867 | 6 | 79924229 | TMEM200B | 5615  | 7.62E-03 |
| ASGA0105794 | 6 | 1.27E+08 | -        | -     | 9.13E-03 |
| M1GA0008912 | 6 | 1.27E+08 | -        | -     | 9.98E-03 |
| ASGA0029775 | 6 | 1.39E+08 | -        | -     | 5.94E-03 |
| ASGA0104725 | 6 | 1.46E+08 | TTC4     | 26930 | 6.12E-03 |
| ALGA0116372 | 6 | 1.55E+08 | ERI3     | match | 5.26E-03 |
| H3GA0010900 | 7 | 5120430  | BMP6     | 41987 | 8.90E-03 |

|             |   |          |         |       |          |
|-------------|---|----------|---------|-------|----------|
| H3GA0020119 | 7 | 17178315 | CDKAL1  | match | 9.43E-03 |
| MARC0024047 | 7 | 18074254 | -       | -     | 5.79E-03 |
| H3GA0021382 | 7 | 49132338 | -       | -     | 3.14E-03 |
| ASGA0033396 | 7 | 49191515 | -       | -     | 4.06E-03 |
| ALGA0041186 | 7 | 49212847 | -       | -     | 2.86E-03 |
| ASGA0033431 | 7 | 49785873 | -       | -     | 1.57E-03 |
| H3GA0021402 | 7 | 50260219 | CRISP1  | 15588 | 6.28E-03 |
| H3GA0021406 | 7 | 50518152 | -       | -     | 9.02E-03 |
| ALGA0041468 | 7 | 52319155 | -       | -     | 3.51E-03 |
| H3GA0021745 | 7 | 56152592 | -       | -     | 8.15E-04 |
| ASGA0034040 | 7 | 56199606 | -       | -     | 6.76E-03 |
| MARC0001031 | 7 | 57317276 | TM6SF1  | match | 4.43E-03 |
| ALGA0042134 | 7 | 58188114 | PDE8A   | 98766 | 5.61E-03 |
| ALGA0042187 | 7 | 59301837 | -       | -     | 9.27E-03 |
| H3GA0021903 | 7 | 62283996 | LINGO1  | 93788 | 4.09E-03 |
| M1GA0010442 | 7 | 62310234 | LINGO1  | 67550 | 5.84E-03 |
| H3GA0021941 | 7 | 63940639 | ISLR    | 27268 | 3.03E-03 |
| ASGA0034428 | 7 | 70929327 | NPAS3   | match | 5.46E-03 |
| M1GA0010466 | 7 | 71050476 | NPAS3   | 79545 | 2.53E-03 |
| MARC0006751 | 7 | 71727031 | -       | -     | 4.90E-03 |
| ASGA0034705 | 7 | 88646106 | -       | -     | 7.80E-03 |
| ALGA0043433 | 7 | 91741766 | RGMA    | 73267 | 7.33E-03 |
| ALGA0043428 | 7 | 91766941 | RGMA    | 48092 | 2.95E-03 |
| ALGA0043424 | 7 | 91780068 | RGMA    | 34965 | 4.17E-03 |
| ALGA0043415 | 7 | 91825127 | RGMA    | match | 4.17E-03 |
| ALGA0043406 | 7 | 91890551 | CHD2    | match | 1.60E-03 |
| ALGA0043404 | 7 | 91922539 | CHD2    | match | 1.60E-03 |
| DRGA0007977 | 7 | 92008579 | CHD2    | 5988  | 1.60E-03 |
| ALGA0043403 | 7 | 92021174 | CHD2    | 18583 | 2.39E-03 |
| ALGA0043398 | 7 | 92050130 | CHD2    | 47539 | 2.84E-03 |
| ALGA0043393 | 7 | 92089815 | CHD2    | 87224 | 1.45E-03 |
| ALGA0043388 | 7 | 92162122 | FAM174B | 49639 | 2.39E-03 |
| H3GA0022349 | 7 | 92212775 | FAM174B | match | 3.85E-03 |

|             |    |          |             |       |          |
|-------------|----|----------|-------------|-------|----------|
| M1GA0010535 | 7  | 92231886 | FAM174B     | match | 1.80E-03 |
| MARC0095879 | 7  | 95409946 | RAB15       | 7121  | 5.13E-03 |
| MARC0098820 | 7  | 1.2E+08  | SLC24A4     | 1550  | 7.88E-03 |
| H3GA0023236 | 7  | 1.21E+08 | TMEM251     | 48069 | 9.42E-03 |
| ALGA0045073 | 7  | 1.22E+08 | -           | -     | 6.11E-03 |
| MARC0044680 | 7  | 1.23E+08 | GSC         | 26063 | 2.37E-03 |
| ALGA0120902 | 9  | 11173743 | MOGAT2      | 40781 | 9.37E-03 |
| ALGA0119045 | 9  | 15055605 | ssc-mir-708 | 64872 | 1.68E-03 |
| ASGA0106225 | 9  | 22588132 | ME3         | 1498  | 7.76E-04 |
| ASGA0099198 | 9  | 22748344 | ME3         | 56081 | 4.19E-03 |
| ALGA0118782 | 9  | 22793075 | -           | -     | 2.20E-03 |
| MARC0019308 | 9  | 25110616 | TYR         | 54202 | 4.53E-03 |
| H3GA0026870 | 9  | 30522282 | PIWIL4      | 17025 | 4.76E-03 |
| ALGA0052237 | 9  | 32169995 | -           | -     | 5.64E-03 |
| MARC0018577 | 9  | 36364394 | TRPC6       | 255   | 1.25E-03 |
| ALGA0114399 | 9  | 36476161 | ANGPTL5     | 82952 | 3.32E-03 |
| ASGA0096889 | 9  | 37305665 | MMP27       | 6788  | 6.09E-03 |
| MARC0086124 | 9  | 37323349 | MMP27       | match | 6.90E-03 |
| ALGA0102606 | 9  | 37337886 | MMP8        | match | 6.08E-03 |
| ASGA0042475 | 9  | 37614741 | DCUN1D5     | 5328  | 3.93E-03 |
| DIAS0004102 | 9  | 37622654 | DCUN1D5     | match | 3.36E-03 |
| ASGA0042913 | 9  | 49127680 | BUD13       | 81254 | 9.20E-03 |
| H3GA0027281 | 9  | 51825334 | PVRL1       | 55932 | 5.33E-03 |
| ASGA0043018 | 9  | 52486044 | OAF         | 53775 | 3.61E-03 |
| MARC0057714 | 9  | 1.32E+08 | -           | -     | 9.38E-03 |
| ALGA0055453 | 9  | 1.42E+08 | SMYD2       | 50732 | 7.71E-04 |
| ALGA0055456 | 9  | 1.42E+08 | SMYD2       | 69072 | 9.58E-03 |
| ALGA0056924 | 10 | 11062696 | LYPLAL1     | 1973  | 7.47E-03 |
| ASGA0046818 | 10 | 17948351 | AKT3        | 17715 | 9.55E-03 |
| ASGA0046812 | 10 | 18176414 | AKT3        | match | 9.23E-03 |
| MARC0064247 | 10 | 19258175 | ZBTB18      | 97827 | 6.37E-03 |
| ALGA0058975 | 10 | 50080838 | PTER        | match | 2.86E-03 |
| H3GA0030974 | 11 | 2923443  | -           | -     | 1.06E-03 |

|             |    |          |         |       |          |
|-------------|----|----------|---------|-------|----------|
| ALGA0060411 | 11 | 4117930  | USP12   | 46528 | 2.25E-04 |
| ALGA0060892 | 11 | 12388831 | CCNA1   | 24088 | 2.99E-03 |
| MARC0031054 | 11 | 15537141 | FOXO1   | 7719  | 8.32E-03 |
| MARC0065987 | 11 | 16153984 | NEK5    | match | 4.06E-03 |
| ASGA0091162 | 11 | 18394930 | ARL11   | 18017 | 1.53E-03 |
| ALGA0061166 | 11 | 18613210 | SETDB2  | 14124 | 4.01E-03 |
| INRA0035578 | 11 | 19434517 | CYSLTR2 | 31003 | 8.76E-04 |
| H3GA0031500 | 11 | 19458211 | CYSLTR2 | 7309  | 6.58E-03 |
| DRGA0010995 | 11 | 28499617 | -       | -     | 2.04E-03 |
| DRGA0011044 | 11 | 30843049 | -       | -     | 2.90E-04 |
| ALGA0111608 | 11 | 33518592 | -       | -     | 6.97E-03 |
| MARC0058247 | 11 | 40557571 | -       | -     | 8.83E-03 |
| MARC0038885 | 11 | 42076772 | -       | -     | 9.26E-03 |
| DRGA0011147 | 11 | 42683281 | -       | -     | 7.20E-04 |
| ALGA0061971 | 11 | 43178260 | -       | -     | 5.91E-03 |
| ALGA0062095 | 11 | 48231247 | -       | -     | 4.59E-03 |
| ASGA0050759 | 11 | 49418020 | RPS3A   | 60162 | 7.71E-03 |
| DRGA0011263 | 11 | 51624925 | -       | -     | 7.89E-03 |
| MARC0064023 | 11 | 52484631 | UCHL3   | 7498  | 1.34E-03 |
| MARC0057778 | 11 | 52507508 | UCHL3   | 30375 | 2.14E-03 |
| H3GA0031956 | 11 | 53021827 | -       | -     | 5.27E-03 |
| ALGA0062282 | 11 | 53081698 | -       | -     | 3.95E-03 |
| INRA0036447 | 11 | 53204913 | -       | -     | 1.28E-03 |
| MARC0112524 | 11 | 53343454 | -       | -     | 5.63E-04 |
| DRGA0011285 | 11 | 53365158 | -       | -     | 1.46E-03 |
| INRA0036471 | 11 | 54041663 | MYCBP2  | 7359  | 2.48E-03 |
| INRA0036473 | 11 | 54059956 | MYCBP2  | 25652 | 3.99E-03 |
| ALGA0062309 | 11 | 54125788 | MYCBP2  | 91484 | 7.84E-03 |
| ASGA0102962 | 11 | 75272010 | -       | -     | 2.09E-03 |
| ALGA0063437 | 11 | 76088356 | ZIC5    | match | 3.77E-03 |
| M1GA0015266 | 11 | 76187291 | ZIC2    | 79290 | 2.13E-03 |
| MARC0021953 | 11 | 76512208 | GGACT   | 37247 | 1.01E-03 |
| ASGA0051686 | 11 | 76688874 | TMTC4   | match | 5.72E-03 |

|             |    |          |         |       |          |
|-------------|----|----------|---------|-------|----------|
| ASGA0051750 | 11 | 77617889 | -       | -     | 8.06E-03 |
| ASGA0098350 | 12 | 8826038  | -       | -     | 2.58E-03 |
| ASGA0052986 | 12 | 8952780  | SOX9    | 74859 | 9.47E-03 |
| ALGA0065691 | 12 | 24829127 | HOXB9   | 13910 | 6.16E-03 |
| MARC0013292 | 12 | 24901251 | HOXB13  | 2806  | 9.43E-03 |
| MARC0065078 | 12 | 42958510 | -       | -     | 7.96E-03 |
| ALGA0066582 | 12 | 44523799 | RHOT1   | 23380 | 9.54E-03 |
| MARC0110796 | 12 | 48693970 | GOSR1   | 10842 | 1.48E-03 |
| H3GA0034708 | 12 | 54636449 | BCL6B   | 71720 | 7.59E-03 |
| M1GA0017107 | 12 | 59863471 | -       | -     | 9.96E-03 |
| MARC0093419 | 12 | 60329152 | -       | -     | 1.84E-03 |
| ASGA0100802 | 12 | 60335124 | -       | -     | 7.49E-04 |
| ASGA0101283 | 12 | 60445578 | -       | -     | 2.12E-04 |
| H3GA0052996 | 12 | 60451706 | -       | -     | 4.63E-05 |
| ALGA0120651 | 12 | 60466957 | -       | -     | 5.28E-05 |
| H3GA0034965 | 12 | 60524116 | -       | -     | 9.13E-04 |
| M1GA0017119 | 12 | 60549103 | -       | -     | 2.07E-04 |
| M1GA0017151 | 12 | 60577246 | -       | -     | 1.61E-03 |
| MARC0030180 | 12 | 61535474 | U6atac  | 30049 | 5.75E-03 |
| MARC0050410 | 12 | 61605585 | -       | -     | 5.69E-03 |
| ASGA0055602 | 13 | 2180354  | -       | -     | 4.49E-03 |
| ALGA0067480 | 13 | 3433598  | GALNT15 | 86918 | 7.86E-03 |
| MARC0015921 | 13 | 4575905  | TBC1D5  | match | 8.01E-03 |
| ASGA0089913 | 13 | 5308771  | -       | -     | 7.47E-03 |
| ALGA0067602 | 13 | 6000731  | SATB1   | 16413 | 1.97E-03 |
| MARC0037054 | 13 | 7650575  | EFHB    | 77580 | 6.36E-04 |
| ASGA0055807 | 13 | 7699209  | EFHB    | 28946 | 2.55E-03 |
| M1GA0025009 | 13 | 25577420 | SCN5A   | match | 7.19E-03 |
| MARC0004520 | 13 | 1.41E+08 | -       | -     | 7.37E-03 |
| MARC0093228 | 13 | 1.41E+08 | -       | -     | 5.62E-03 |
| H3GA0037291 | 13 | 1.41E+08 | -       | -     | 6.88E-03 |
| MARC0093203 | 13 | 1.44E+08 | TNK2    | 8716  | 6.88E-03 |
| ALGA0073790 | 13 | 2.1E+08  | -       | -     | 3.90E-03 |



|             |    |          |         |       |          |
|-------------|----|----------|---------|-------|----------|
| ALGA0109869 | 13 | 2.1E+08  | SIM2    | 24130 | 8.40E-03 |
| ALGA0073982 | 13 | 2.14E+08 | -       | -     | 1.13E-03 |
| ALGA0073987 | 13 | 2.14E+08 | -       | -     | 7.95E-04 |
| M1GA0017861 | 13 | 2.14E+08 | -       | -     | 7.25E-04 |
| H3GA0038523 | 14 | 5972387  | GFRA2   | 92072 | 4.20E-03 |
| ALGA0074628 | 14 | 6363534  | -       | -     | 8.00E-03 |
| ASGA0061144 | 14 | 10777706 | CDCA2   | 46175 | 1.36E-03 |
| ALGA0075064 | 14 | 10905579 | -       | -     | 3.09E-03 |
| MARC0025520 | 14 | 30477143 | -       | -     | 6.00E-03 |
| MARC0080850 | 14 | 41317882 | RPH3A   | match | 8.00E-03 |
| MARC0016119 | 14 | 44298981 | UNG     | 12724 | 6.56E-03 |
| ALGA0077164 | 14 | 44313339 | UNG     | match | 3.07E-03 |
| ALGA0077178 | 14 | 44528915 | SSH1    | match | 3.10E-03 |
| INRA0043787 | 14 | 44548710 | SSH1    | match | 2.19E-03 |
| ASGA0063107 | 14 | 46665998 | -       | -     | 7.46E-03 |
| ASGA0063110 | 14 | 46685558 | -       | -     | 8.05E-03 |
| ASGA0063368 | 14 | 53273094 | MIF     | 9458  | 4.02E-03 |
| ALGA0077597 | 14 | 54540355 | SLC25A1 | 1209  | 3.65E-03 |
| ASGA0063385 | 14 | 54569925 | SLC25A1 | 25470 | 2.77E-03 |
| ALGA0077602 | 14 | 54595487 | HIRA    | 617   | 5.78E-03 |
| ALGA0077603 | 14 | 54680716 | UFD1L   | 42    | 4.44E-03 |
| H3GA0040220 | 14 | 54744216 | UFD1L   | match | 2.77E-03 |
| ASGA0063388 | 14 | 54791586 | CLDN5   | 12252 | 2.77E-03 |
| ASGA0063392 | 14 | 54837568 | U3      | 25135 | 5.78E-03 |
| MARC0059175 | 14 | 54867497 | SEPT5   | 24594 | 3.65E-03 |
| ASGA0063418 | 14 | 56633326 | -       | -     | 7.32E-03 |
| ALGA0077635 | 14 | 56741944 | -       | -     | 6.38E-03 |
| MARC0066981 | 14 | 56894113 | -       | -     | 7.70E-03 |
| ASGA0063487 | 14 | 58847222 | LGALS8  | match | 9.39E-03 |
| ASGA0063736 | 14 | 62108085 | MAP10   | 13196 | 3.47E-03 |
| MARC0008126 | 14 | 65033626 | URB2    | 6270  | 9.33E-03 |
| ASGA0063956 | 14 | 65870468 | ZNF37A  | 24351 | 8.90E-03 |
| MARC0059823 | 14 | 65951741 | -       | -     | 9.87E-03 |

|             |    |          |            |       |          |
|-------------|----|----------|------------|-------|----------|
| ASGA0063978 | 14 | 66119152 | RET        | 42564 | 1.56E-03 |
| MARC0097527 | 14 | 66239886 | CSGALNACT2 | match | 9.08E-03 |
| H3GA0040656 | 14 | 66437562 | FXVD4      | 27335 | 3.18E-03 |
| ALGA0078253 | 14 | 66455930 | FXVD4      | 8967  | 8.41E-03 |
| ASGA0064014 | 14 | 66708189 | BICC1      | match | 4.02E-03 |
| H3GA0040682 | 14 | 67337783 | -          | -     | 5.75E-03 |
| MARC0009517 | 14 | 67360532 | -          | -     | 3.82E-03 |
| ALGA0078315 | 14 | 67556695 | FAM13C     | match | 4.79E-03 |
| ASGA0064046 | 14 | 67586214 | FAM13C     | match | 4.59E-03 |
| ASGA0064057 | 14 | 67938907 | SLC16A9    | 61736 | 4.09E-03 |
| ALGA0078325 | 14 | 67973979 | SLC16A9    | 26664 | 3.65E-03 |
| H3GA0040698 | 14 | 68241945 | CCDC6      | match | 8.48E-03 |
| ALGA0078353 | 14 | 68492083 | ANK3       | match | 8.69E-03 |
| MARC0047133 | 14 | 68911064 | -          | -     | 8.13E-03 |
| DRGA0013970 | 14 | 69219663 | PSMA5      | 35898 | 7.51E-03 |
| DRGA0013984 | 14 | 70168690 | -          | -     | 3.25E-03 |
| ALGA0078438 | 14 | 70180492 | -          | -     | 4.19E-03 |
| ALGA0078447 | 14 | 70318427 | -          | -     | 8.01E-03 |
| ASGA0064171 | 14 | 70424031 | -          | -     | 5.89E-03 |
| M1GA0018867 | 14 | 81218454 | DNAJB12    | 224   | 1.23E-03 |
| H3GA0042409 | 14 | 1.35E+08 | -          | -     | 4.89E-03 |
| ASGA0066628 | 14 | 1.35E+08 | ADRB1      | 96737 | 4.06E-03 |
| ASGA0066777 | 14 | 1.37E+08 | ATRNL1     | 28528 | 3.48E-03 |
| ASGA0068236 | 14 | 1.52E+08 | -          | -     | 9.40E-03 |
| ASGA0092166 | 15 | 2613630  | -          | -     | 3.24E-03 |
| MARC0083940 | 15 | 4198197  | -          | -     | 9.19E-03 |
| DRGA0014803 | 15 | 5072478  | -          | -     | 7.10E-03 |
| ASGA0068402 | 15 | 7398646  | -          | -     | 4.63E-03 |
| MARC0035392 | 15 | 53557172 | -          | -     | 3.16E-03 |
| DRGA0015125 | 15 | 53593754 | -          | -     | 7.49E-03 |
| ALGA0090697 | 16 | 52371543 | MAP1B      | 20273 | 3.25E-03 |
| H3GA0046642 | 16 | 55928776 | -          | -     | 8.26E-03 |
| ALGA0090781 | 16 | 57686358 | -          | -     | 3.61E-03 |

|             |    |          |                |       |          |
|-------------|----|----------|----------------|-------|----------|
| ASGA0073900 | 16 | 71043011 | -              | -     | 8.27E-03 |
| ALGA0091318 | 16 | 71070479 | -              | -     | 9.07E-03 |
| ASGA0074891 | 17 | 15174    | -              | -     | 5.08E-03 |
| H3GA0052370 | 17 | 439303   | RPS19          | 13887 | 3.25E-03 |
| ASGA0106200 | 17 | 494222   | RPS19          | 68806 | 8.38E-03 |
| ASGA0097925 | 17 | 536580   | -              | -     | 8.11E-03 |
| ASGA0075356 | 17 | 11848326 | SFRP1          | match | 1.59E-03 |
| MARC0096794 | 17 | 13254722 | PLAT           | 57497 | 2.32E-03 |
| ALGA0095128 | 17 | 46668799 | KIAA1755       | 12352 | 1.66E-03 |
| ASGA0077339 | 17 | 53943853 | CD40           | 519   | 5.52E-03 |
| INRA0054309 | 17 | 58229635 | -              | -     | 4.60E-04 |
| INRA0054308 | 17 | 58236218 | -              | -     | 7.96E-04 |
| INRA0054314 | 17 | 58294982 | PTPN1          | 60151 | 6.44E-03 |
| H3GA0050343 | 18 | 9979868  | -              | -     | 4.04E-03 |
| MARC0069211 | 18 | 10393660 | TBXAS1         | match | 3.38E-03 |
| ALGA0103897 | 18 | 10395342 | TBXAS1         | 1259  | 3.51E-03 |
| ALGA0102027 | 18 | 10404529 | TBXAS1         | 10446 | 3.38E-03 |
| ALGA0114284 | 18 | 10521082 | -              | -     | 3.62E-03 |
| INRA0055202 | 18 | 13299138 | ssc-mir-490-1  | 62842 | 2.33E-03 |
| ALGA0097246 | 18 | 17876779 | -              | -     | 9.88E-03 |
| ASGA0079081 | 18 | 18911412 | -              | -     | 5.24E-03 |
| ASGA0090721 | 18 | 19225959 | TSGA13         | match | 7.22E-03 |
| ASGA0079728 | 18 | 43556023 | BMPER          | 93939 | 5.49E-03 |
| ASGA0079726 | 18 | 43567691 | -              | -     | 7.29E-03 |
| H3GA0050905 | 18 | 47853853 | -              | -     | 2.42E-03 |
| ALGA0098358 | 18 | 48005642 | CPVL           | match | 2.36E-03 |
| MARC0061468 | 18 | 48297065 | -              | -     | 6.70E-03 |
| MARC0103241 | 18 | 48620026 | -              | -     | 2.00E-03 |
| DBWU0000577 | 18 | 49563919 | -              | -     | 3.13E-04 |
| ASGA0080057 | 18 | 49673542 | -              | -     | 3.07E-04 |
| M1GA0023271 | 18 | 50032307 | ssc-mir-196b-1 | 5195  | 1.31E-03 |
| MARC0033103 | 18 | 50615451 | -              | -     | 2.39E-03 |
| ALGA0111601 | 23 | 1182388  | -              | -     | 8.24E-03 |

|             |    |         |                |       |          |
|-------------|----|---------|----------------|-------|----------|
| ASGA0102465 | 23 | 2108185 | CH242-227G12.1 | 17804 | 7.74E-03 |
| ASGA0096921 | 23 | 2174682 | CH242-227G12.1 | 34046 | 1.78E-03 |
| ALGA0103241 | 23 | 3024536 | NLGN4X         | match | 3.00E-03 |
| ALGA0105315 | 23 | 3059017 | NLGN4X         | match | 2.41E-04 |
| ASGA0101131 | 23 | 3744915 | -              | -     | 3.62E-03 |
| MARC0114252 | 23 | 3766084 | -              | -     | 6.24E-03 |
| ALGA0124535 | 23 | 3876374 | -              | -     | 1.58E-03 |
| ASGA0093054 | 23 | 4325817 | STS            | 70802 | 6.87E-03 |

6  
7  
8  
9  
10  
11  
12  
13  
14  
15  
16  
17  
18  
19  
20  
21  
22  
23  
24  
25  
26  
27

28 **Supplementary Table S2.** Gene ontologies with  $p < 0.05$ , count  $> 3$  and the genes involved in the ontology. Count  
 29 is the number of genes involved the ontology and % is (involved genes)/(total genes).

| GO ID      | GO term name                                                            | Count | %     | p-value | Genes                                                                                                                                        |
|------------|-------------------------------------------------------------------------|-------|-------|---------|----------------------------------------------------------------------------------------------------------------------------------------------|
| GO:0043408 | regulation of MAPK cascade                                              | 10    | 8.93  | 0.0018  | BMPER, GDF7, FOXO1, EDAR, RNF149, CD40, PTPN1, MYC, MIF, BMP6                                                                                |
| GO:0006355 | regulation of transcription, DNA-templated                              | 22    | 19.64 | 0.0050  | SATB1, GSC, GDF7, ESR1, HIRA, FOXO1, HOXB13, CD40, SMYD2, SOX9, RGMA, DDX17, BMPER, RPS6KA1, MYRF, BCL6B, CHD2, ABRA, HOXB9, MYC, BMP6, SIM2 |
| GO:2001141 | regulation of RNA biosynthetic process                                  | 22    | 19.64 | 0.0054  | SATB1, GSC, GDF7, ESR1, HIRA, FOXO1, HOXB13, CD40, SMYD2, SOX9, RGMA, DDX17, BMPER, RPS6KA1, MYRF, BCL6B, CHD2, ABRA, HOXB9, MYC, BMP6, SIM2 |
| GO:1902531 | regulation of intracellular signal transduction                         | 15    | 13.39 | 0.0058  | GDF7, ESR1, FOXO1, SMYD2, CD40, EDAR, SOX9, MIF, BMPER, ADRB1, ABRA, PTPN1, RNF149, MYC, BMP6                                                |
| GO:0000165 | MAPK cascade                                                            | 9     | 8.04  | 0.0062  | BMPER, FOXO1, EDAR, RNF149, CD40, PTPN1, SOX9, MYC, MIF                                                                                      |
| GO:0023014 | signal transduction by protein phosphorylation                          | 9     | 8.04  | 0.0065  | BMPER, FOXO1, EDAR, RNF149, CD40, PTPN1, SOX9, MYC, MIF                                                                                      |
| GO:0045935 | positive regulation of nucleobase-containing compound metabolic process | 14    | 12.5  | 0.0072  | DDX17, ADRB1, RPS6KA1, GDF7, UNG, MYRF, ESR1, ABRA, FOXO1, HOXB9, CD40, SOX9, MYC, BMP6                                                      |
| GO:0019220 | regulation of phosphate metabolic process                               | 15    | 13.39 | 0.0072  | WASH1, GDF7, FOXO1, EDAR, CD40, SOX9, MIF, BMPER, ADRB1, CDCA2, RNF149, TNK2, PTPN1, MYC, BMP6                                               |
| GO:0031399 | regulation of protein modification process                              | 15    | 13.39 | 0.0076  | WASH1, GDF7, FOXO1, EDAR, CD40, SOX9, MIF, BMPER, CDCA2, RNF149,                                                                             |

|            |                                                        |    |       |        |                                                                                                                                              |
|------------|--------------------------------------------------------|----|-------|--------|----------------------------------------------------------------------------------------------------------------------------------------------|
|            |                                                        |    |       |        | TNK2, PTPN1, MYC, DCUN1D5, BMP6                                                                                                              |
| GO:0035556 | intracellular signal transduction                      | 20 | 17.86 | 0.0081 | GDF7, ESR1, FOXO1, EDAR, CD40, SMYD2, SOX9, MIF, ARL11, BMPER, ADRB1, RPS6KA1, RHOT1, ABRA, RAB15, RNF149, PTPN1, MYC, GFRA2, BMP6           |
| GO:0045893 | positive regulation of transcription, DNA-templated    | 12 | 10.71 | 0.0091 | DDX17, RPS6KA1, GDF7, MYRF, ESR1, ABRA, FOXO1, HOXB9, CD40, SOX9, MYC, BMP6                                                                  |
| GO:0051252 | regulation of RNA metabolic process                    | 22 | 19.64 | 0.0092 | SATB1, GSC, GDF7, ESR1, HIRA, FOXO1, HOXB13, CD40, SMYD2, SOX9, RGMA, DDX17, BMPER, RPS6KA1, MYRF, BCL6B, CHD2, ABRA, HOXB9, MYC, BMP6, SIM2 |
| GO:0010604 | positive regulation of macromolecule metabolic process | 20 | 17.86 | 0.0095 | GDF7, UNG, ESR1, FOXO1, EDAR, CD40, SOX9, MIF, DDX17, BMPER, RPS6KA1, MYRF, CDCA2, ABRA, HOXB9, TNK2, PTPN1, MYC, DCUN1D5, BMP6              |
| GO:1902680 | positive regulation of RNA biosynthetic process        | 12 | 10.71 | 0.0096 | DDX17, RPS6KA1, GDF7, MYRF, ESR1, ABRA, FOXO1, HOXB9, CD40, SOX9, MYC, BMP6                                                                  |
| GO:0045937 | positive regulation of phosphate metabolic process     | 11 | 9.82  | 0.0112 | ADRB1, BMPER, GDF7, CDCA2, EDAR, CD40, PTPN1, TNK2, SOX9, MIF, BMP6                                                                          |
| GO:0010562 | positive regulation of phosphorus metabolic process    | 11 | 9.82  | 0.0112 | ADRB1, BMPER, GDF7, CDCA2, EDAR, CD40, PTPN1, TNK2, SOX9, MIF, BMP6                                                                          |
| GO:0006351 | transcription, DNA-templated                           | 20 | 17.86 | 0.0115 | SATB1, GSC, GDF7, ESR1, HIRA, FOXO1, SMYD2, CD40, SOX9, RGMA, DDX17, BMPER, RPS6KA1, MYRF, BCL6B, ABRA, HOXB9, MYC, BMP6, SIM2               |

|            |                                                           |    |       |        |                                                                                                                                                         |
|------------|-----------------------------------------------------------|----|-------|--------|---------------------------------------------------------------------------------------------------------------------------------------------------------|
| GO:0051254 | positive regulation of RNA metabolic process              | 12 | 10.71 | 0.0127 | DDX17, RPS6KA1, GDF7, MYRF, ESR1, ABRA, FOXO1, HOXB9, CD40, SOX9, MYC, BMP6                                                                             |
| GO:0022612 | gland morphogenesis                                       | 4  | 3.57  | 0.0140 | GDF7, HOXB13, EDAR, SOX9                                                                                                                                |
| GO:0032774 | RNA biosynthetic process                                  | 22 | 19.64 | 0.0140 | SATB1, GSC, GDF7, ESR1, HIRA, FOXO1, HOXB13, CD40, SMYD2, SOX9, RGMA, DDX17, BMPER, RPS6KA1, MYRF, BCL6B, CHD2, ABRA, HOXB9, MYC, BMP6, SIM2            |
| GO:0031401 | positive regulation of protein modification process       | 11 | 9.82  | 0.0141 | BMPER, GDF7, CDCA2, EDAR, CD40, PTPN1, TNK2, SOX9, DCUN1D5, MIF, BMP6                                                                                   |
| GO:0051247 | positive regulation of protein metabolic process          | 13 | 11.61 | 0.0145 | BMPER, GDF7, CDCA2, FOXO1, EDAR, CD40, PTPN1, TNK2, SOX9, MYC, DCUN1D5, MIF, BMP6                                                                       |
| GO:0007167 | enzyme linked receptor protein signaling pathway          | 9  | 8.04  | 0.0161 | PLAT, RGMA, BMPER, GDF7, FOXO1, PTPN1, TNK2, SOX9, BMP6                                                                                                 |
| GO:0010468 | regulation of gene expression                             | 24 | 21.43 | 0.0163 | SATB1, GSC, GDF7, ESR1, HIRA, FOXO1, HOXB13, EDAR, CD40, SMYD2, SOX9, MIF, RGMA, DDX17, BMPER, RPS6KA1, MYRF, BCL6B, CHD2, ABRA, HOXB9, MYC, SIM2, BMP6 |
| GO:0010628 | positive regulation of gene expression                    | 13 | 11.61 | 0.0175 | DDX17, RPS6KA1, GDF7, MYRF, ESR1, ABRA, FOXO1, HOXB9, EDAR, CD40, SOX9, MYC, BMP6                                                                       |
| GO:0048732 | gland development                                         | 6  | 5.36  | 0.0207 | TYR, GDF7, HOXB13, HOXB9, EDAR, SOX9                                                                                                                    |
| GO:2000112 | regulation of cellular macromolecule biosynthetic process | 22 | 19.64 | 0.0208 | SATB1, GSC, GDF7, ESR1, HIRA, FOXO1, HOXB13, CD40, SMYD2, SOX9, RGMA, DDX17, BMPER, RPS6KA1, MYRF, BCL6B, CHD2, ABRA, HOXB9, MYC, BMP6, SIM2            |

|            |                                                           |    |       |        |                                                                                                                                                     |
|------------|-----------------------------------------------------------|----|-------|--------|-----------------------------------------------------------------------------------------------------------------------------------------------------|
| GO:0043409 | negative regulation of MAPK cascade                       | 4  | 3.57  | 0.0211 | FOXO1, RNF149, PTPN1, MYC                                                                                                                           |
| GO:0031328 | positive regulation of cellular biosynthetic process      | 13 | 11.61 | 0.0218 | DDX17, ADRB1, RPS6KA1, GDF7, MYRF, ESR1, ABRA, FOXO1, HOXB9, CD40, SOX9, MYC, BMP6                                                                  |
| GO:0032270 | positive regulation of cellular protein metabolic process | 12 | 10.71 | 0.0233 | BMPER, GDF7, CDCA2, EDAR, CD40, PTPN1, TNK2, SOX9, MYC, DCUN1D5, MIF, BMP6                                                                          |
| GO:0030509 | BMP signaling pathway                                     | 4  | 3.57  | 0.0253 | RGMA, BMPER, GDF7, BMP6                                                                                                                             |
| GO:0010556 | regulation of macromolecule biosynthetic process          | 22 | 19.64 | 0.0272 | SATB1, GSC, GDF7, ESR1, HIRA, FOXO1, HOXB13, CD40, SMYD2, SOX9, RGMA, DDX17, BMPER, RPS6KA1, MYRF, BCL6B, CHD2, ABRA, HOXB9, MYC, BMP6, SIM2        |
| GO:0034654 | nucleobase-containing compound biosynthetic process       | 23 | 20.56 | 0.0282 | SATB1, GSC, GDF7, ESR1, HIRA, FOXO1, HOXB13, CD40, SMYD2, SOX9, RGMA, DDX17, BMPER, ADRB1, RPS6KA1, MYRF, BCL6B, CHD2, ABRA, HOXB9, MYC, SIM2, BMP6 |
| GO:0035148 | tube formation                                            | 4  | 3.57  | 0.0284 | RGMA, GDF7, EDAR, SOX9                                                                                                                              |
| GO:0071772 | response to BMP                                           | 4  | 3.57  | 0.0292 | RGMA, BMPER, GDF7, BMP6                                                                                                                             |
| GO:0060627 | regulation of vesicle-mediated transport                  | 6  | 5.36  | 0.0300 | SEPT5, TBC1D8, RAB15, GOSR1, PTPN1, TNK2                                                                                                            |
| GO:0010557 | positive regulation of macromolecule biosynthetic process | 12 | 10.71 | 0.0313 | DDX17, RPS6KA1, GDF7, MYRF, ESR1, ABRA, FOXO1, HOXB9, CD40, SOX9, MYC, BMP6                                                                         |
| GO:0015031 | protein transport                                         | 12 | 10.71 | 0.037  | KDEL3, STX12, TBC1D8, XPO6, ABRA, EDAR, GOSR1, CD40, PTPN1, GCC2, MIF, BMP6                                                                         |
| GO:0032268 | regulation of cellular protein metabolic process          | 16 | 14.29 | 0.042  | PLAT, WASH1, GDF7, FOXO1, EDAR, CD40, SOX9, MIF, BMPER, CDCA2, RNF149, TNK2,                                                                        |



|            |                                                                 |    |       |        |                                                                                                                                                |
|------------|-----------------------------------------------------------------|----|-------|--------|------------------------------------------------------------------------------------------------------------------------------------------------|
|            |                                                                 |    |       |        | PTPN1, MYC, DCUN1D5, BMP6                                                                                                                      |
| GO:1902532 | negative regulation of intracellular signal transduction        | 6  | 5.36  | 0.0451 | ESR1, FOXO1, RNF149, PTPN1, MYC, MIF                                                                                                           |
| GO:0032872 | regulation of stress-activated MAPK cascade                     | 4  | 3.57  | 0.0463 | FOXO1, EDAR, PTPN1, MYC                                                                                                                        |
| GO:0036211 | protein modification process                                    | 21 | 18.75 | 0.0473 | SATB1, WASH1, GDF7, FOXO1, EDAR, CD40, SMYD2, SOX9, MIF, BMPER, USP12, GALNT15, CDCA2, UCHL3, RNF149, LYPLAL1, PTPN1, TNK2, MYC, DCUN1D5, BMP6 |
| GO:0006464 | cellular protein modification process                           | 21 | 18.75 | 0.0473 | SATB1, WASH1, GDF7, FOXO1, EDAR, CD40, SMYD2, SOX9, MIF, BMPER, USP12, GALNT15, CDCA2, UCHL3, RNF149, LYPLAL1, PTPN1, TNK2, MYC, DCUN1D5, BMP6 |
| GO:0070302 | regulation of stress-activated protein kinase signaling cascade | 4  | 3.57  | 0.0476 | FOXO1, EDAR, PTPN1, MYC                                                                                                                        |
